# Supplementary material
Source: Springer Nature journal article supplement (https://www.springermedizin.de/resource/supplementary/13256_2012_2484_MOESM1_ESM.pdf/9650354)

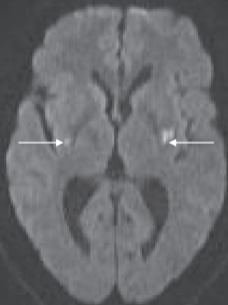

**A**

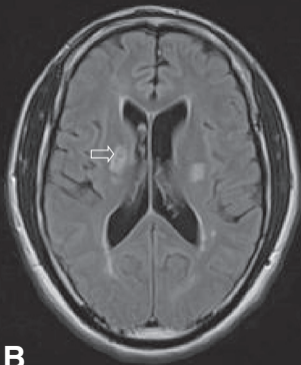

**B**

Supplement: MOESM1 [file 9650354]
